# Supplementary material
Source: PubMed Central journal article supplement (PMC7309312)
Supplement: sb0c00130_si_001.pdf [file sb0c00130_si_001.pdf]

# Supporting Information

## High-throughput screening for substrate specificity-adapted mutants of the nisin dehydratase NisB

Xinghong Zhao <sup>1,2</sup>, Rubén Cebrián <sup>1</sup>, Yuxin Fu <sup>1</sup>, Rick Rink <sup>3</sup>, Tjibbe Bosma <sup>3</sup>, Gert N. Moll <sup>1,3</sup> and Oscar P. Kuipers <sup>1,\*</sup>

<sup>1</sup> Department of Molecular Genetics, Groningen Biomolecular Sciences and Biotechnology Institute, University of Groningen, Groningen 9747 AG, The Netherlands.

<sup>2</sup> Natural Medicine Research Center, College of Veterinary Medicine, Sichuan Agricultural University, Chengdu 611130, China.

<sup>3</sup> Lanthio Pharma, Rozenburglaan 13 B, Groningen 9727 DL, The Netherlands.

\* Correspondence: o.p.kuipers@rug.nl (Oscar P. Kuipers)

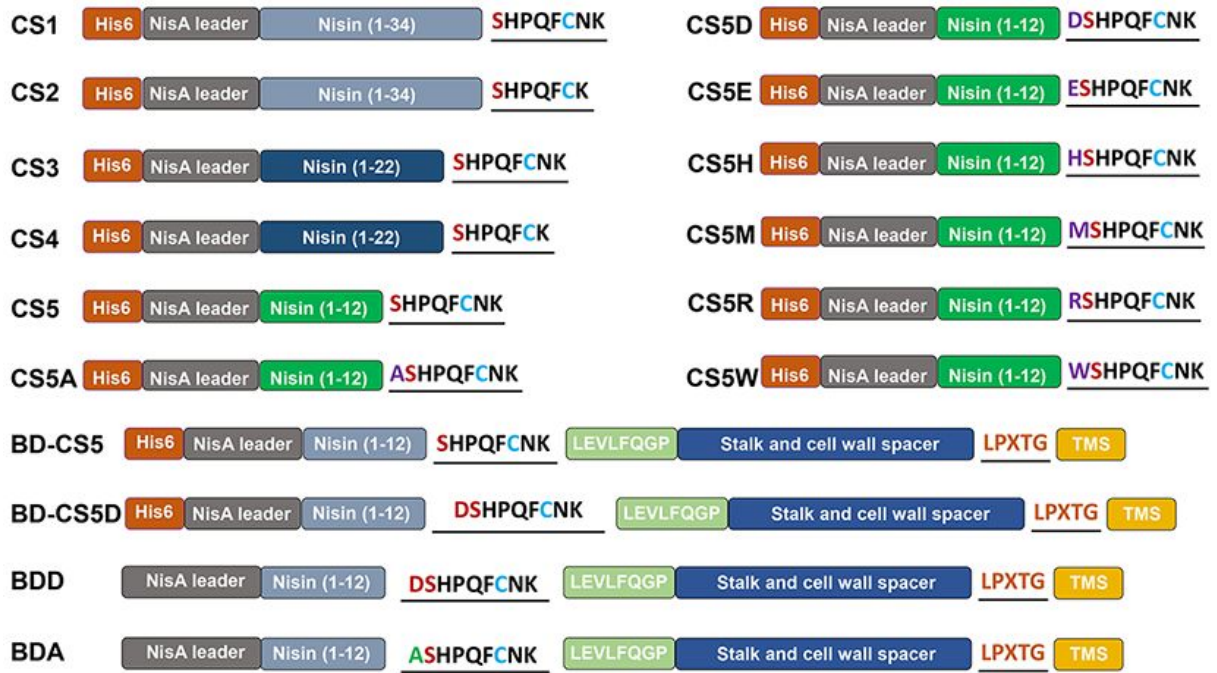

**Supplemental Figure 1.** Amino acid sequence of designed peptides.

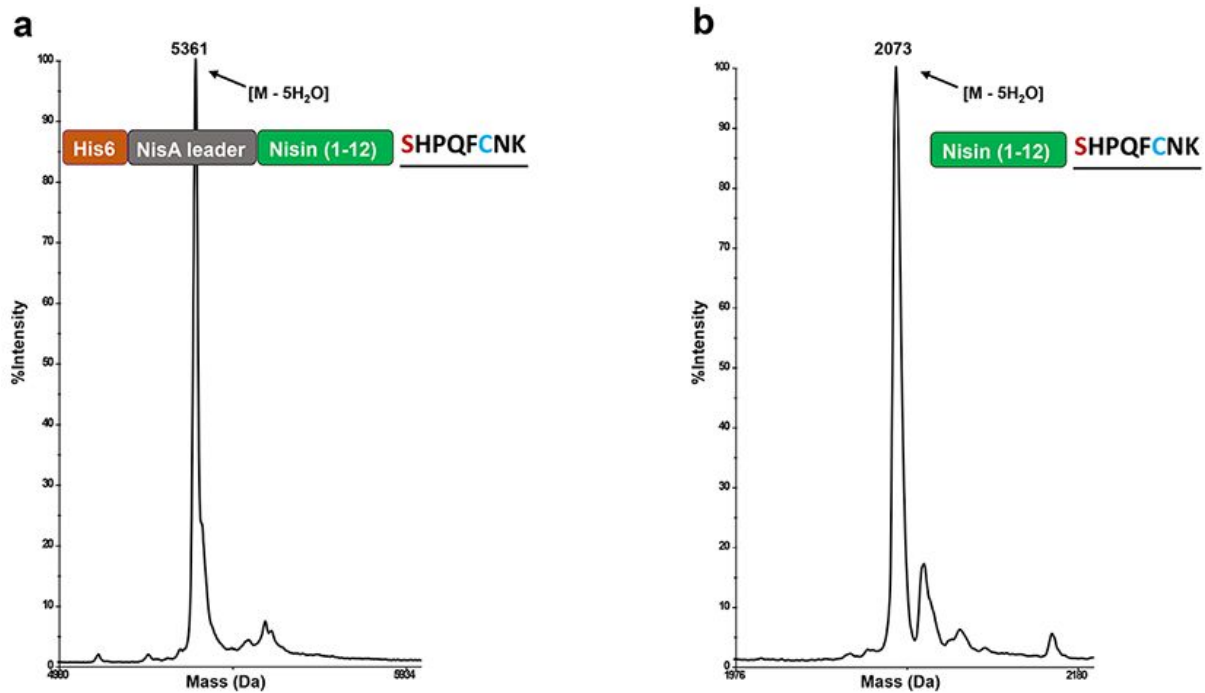

**Supplemental Figure 2.** MALDI-TOF MS data of CS5 before (a) and after (b) cleavage of the leader peptide.

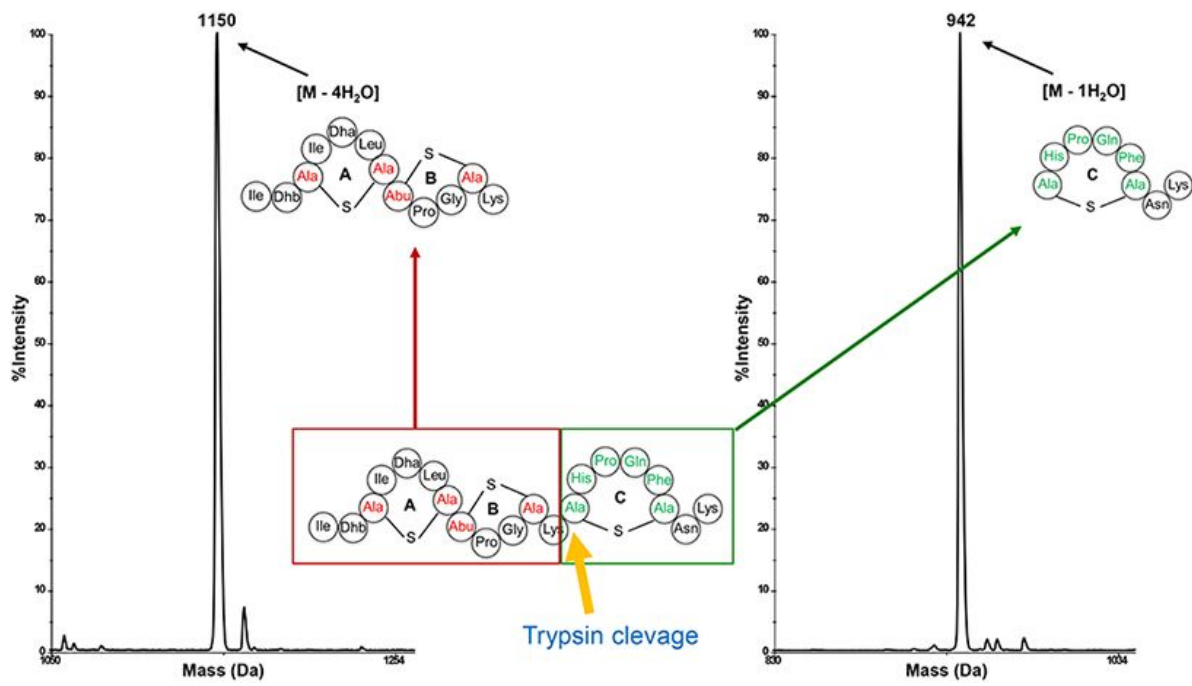

**Supplemental Figure 3.** MALDI-TOF MS data of trypsin treated CS5 fragments. It demonstrates that the cyclic strep-ligand was correctly formed since CS5 was cleaved by trypsin after Lys12, liberating the cyclic strep-ligand.

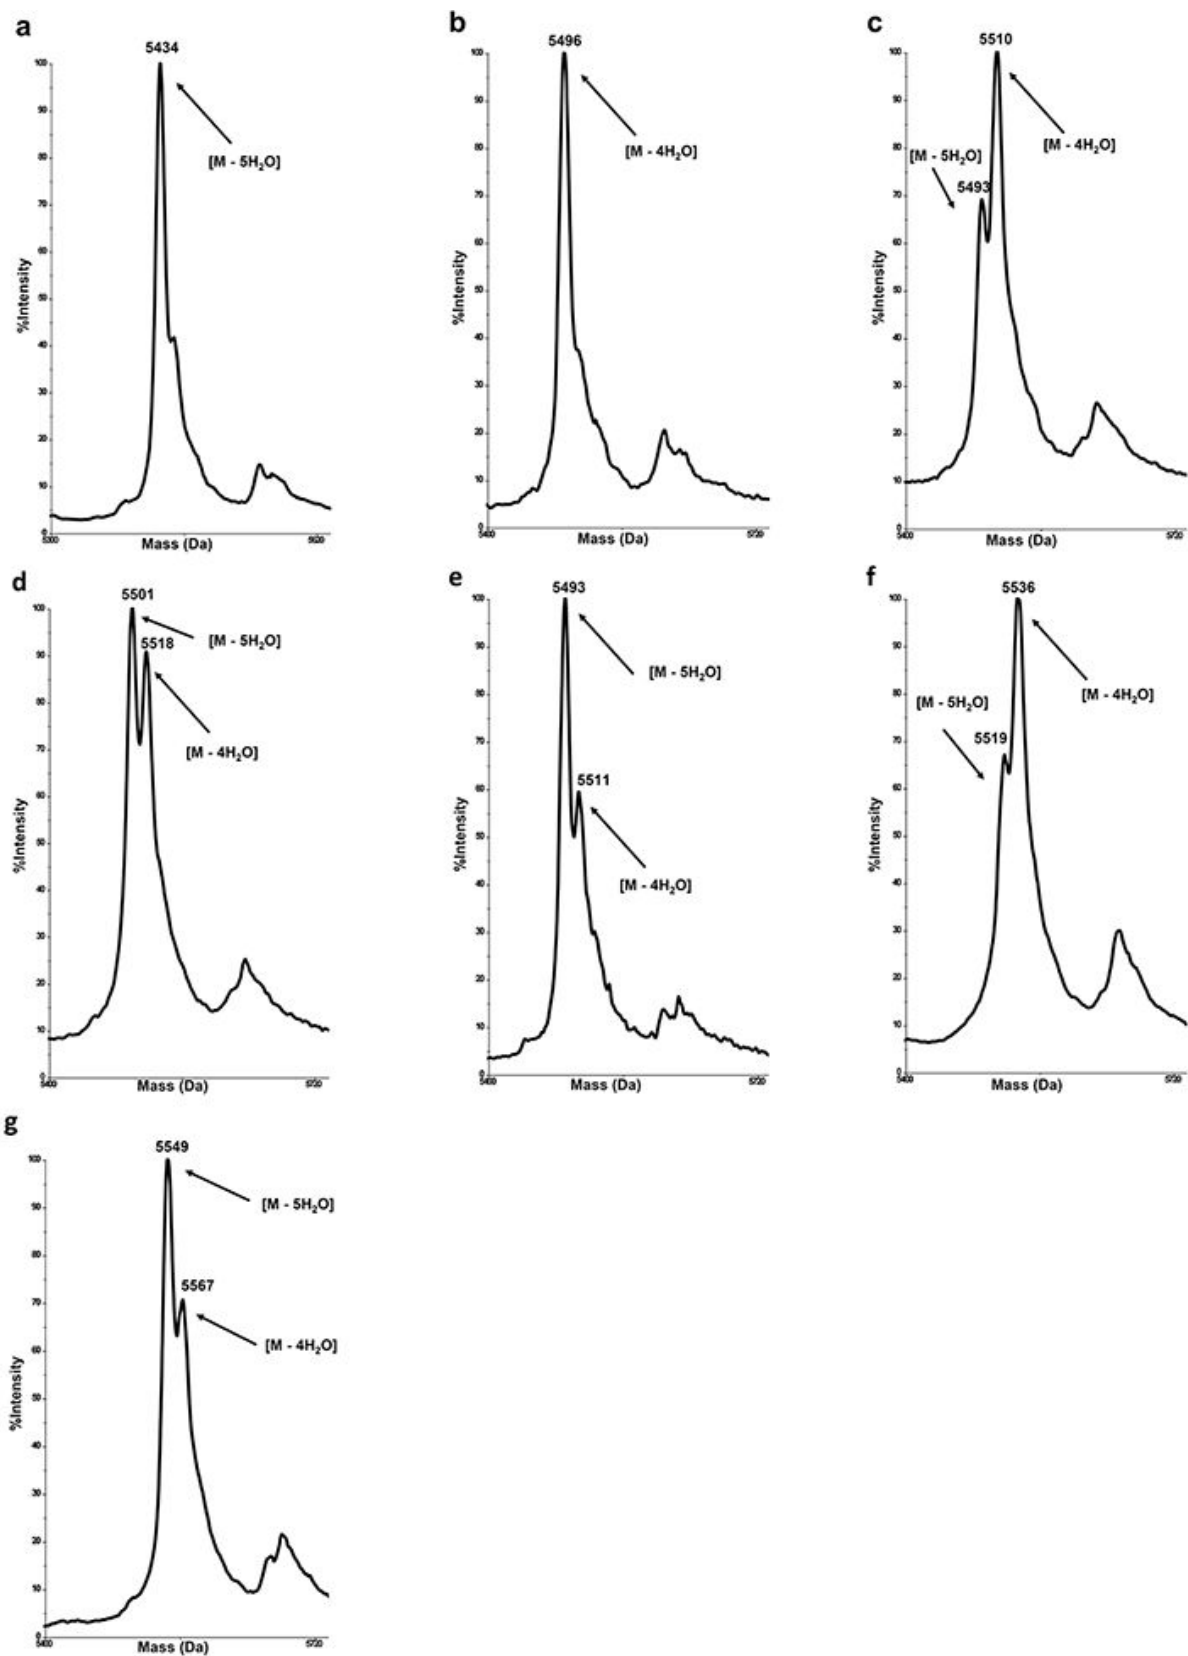

**Supplemental Figure 4.** MALDI-TOF MS data of CS5A (a), CS5D (b), CS5E (c), CS5H (d), CS5M (e), CS5R (f), CS5W (g).

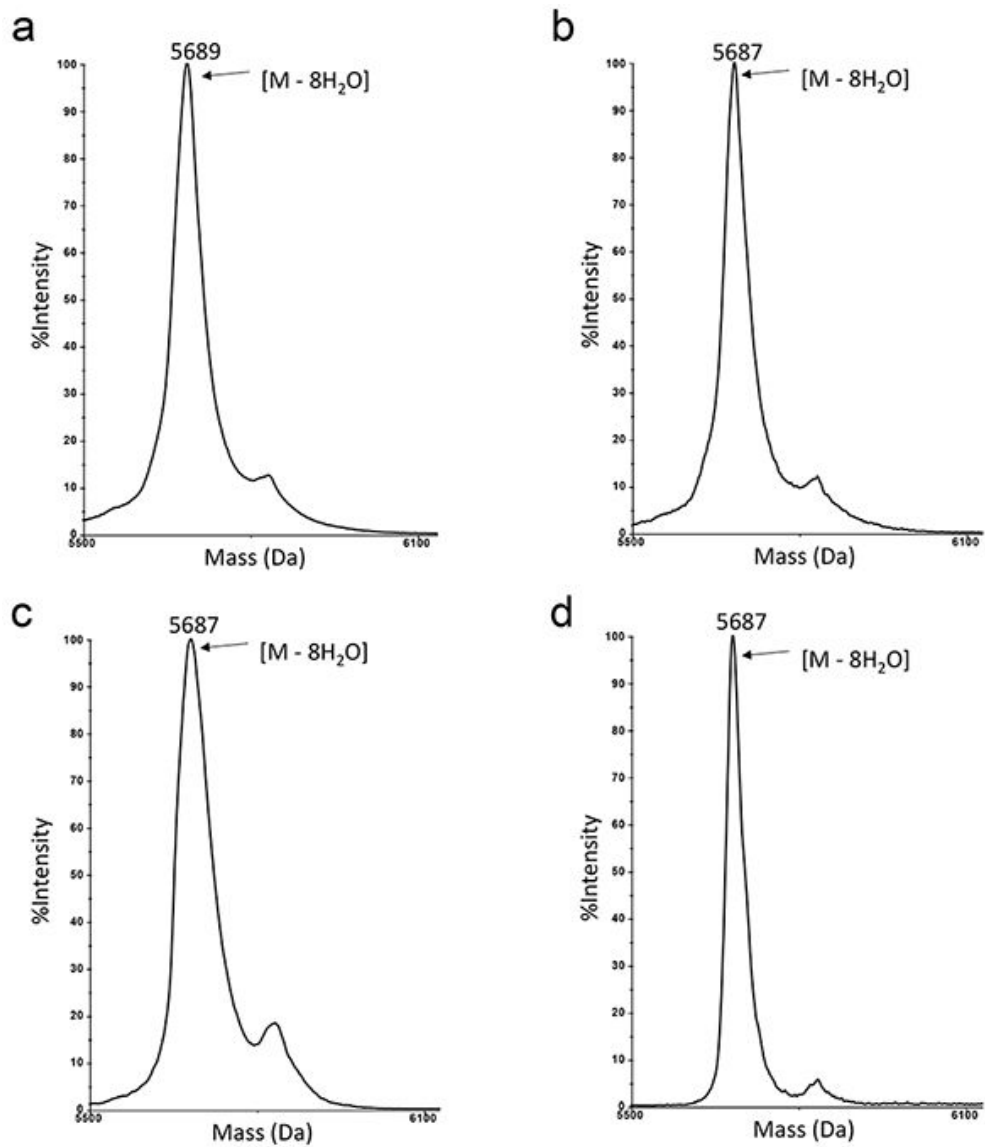

**Supplemental Figure 5.** MALDI-TOF MS data of nisin modified by NisB mutants. **a**, modified by NisB<sup>wt</sup>; **b**, modified by NisB<sup>S88P/D234N</sup>; **c**, modified by NisB<sup>S88P</sup>; **d**, modified by NisB<sup>D234N</sup>.

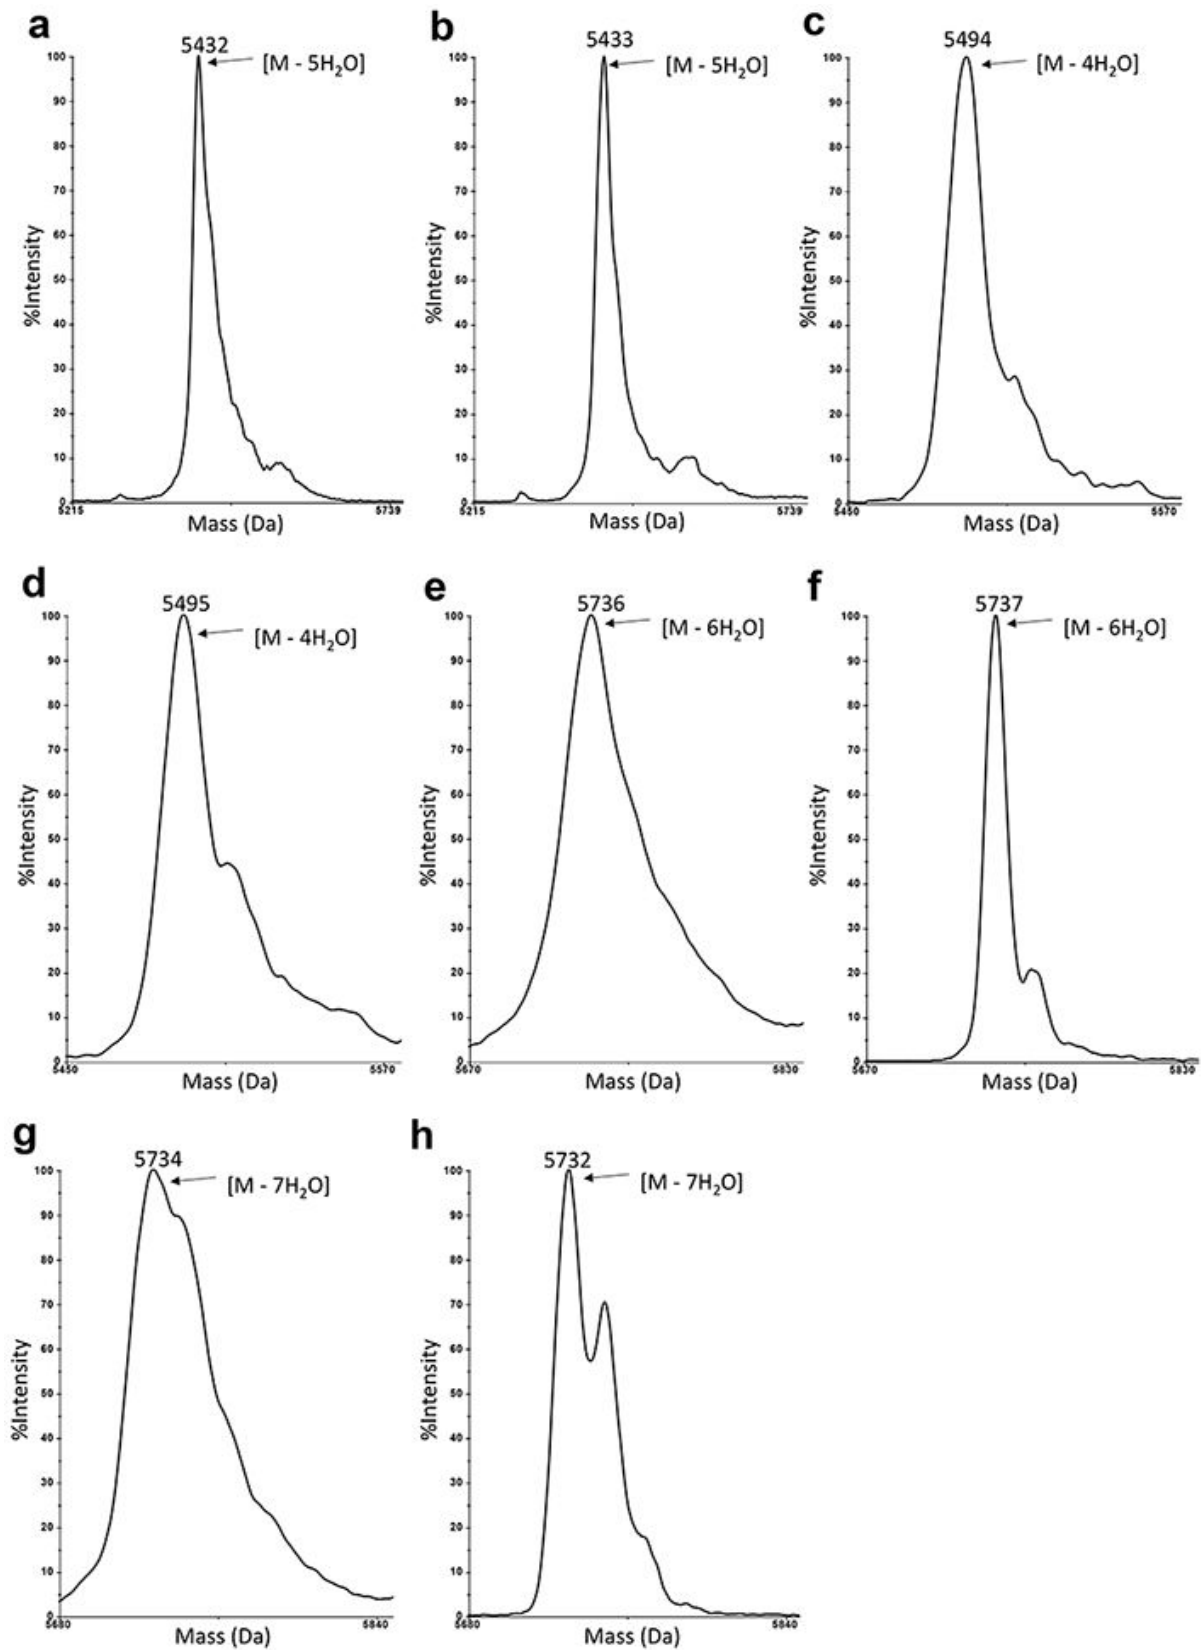

**Supplemental Figure 6.** MALDI-TOF MS data of peptides modified by NisB mutants. **a**, CS5A, modified by NisB<sup>S88P</sup>; **b**, CS5A, modified by NisB<sup>D234N</sup>; **c**, CS5D, modified by NisB<sup>S88P</sup>; **d**, CS5D, modified by NisB<sup>D234N</sup>; **e**, nisin<sup>T2D</sup>, modified by NisB<sup>S88P</sup>; **f**, nisin<sup>T2D</sup>, modified by NisB<sup>D234N</sup>; **g**, nisin<sup>T2E</sup>, modified by NisB<sup>S88P</sup>; **h**, nisin<sup>T2E</sup>, modified by NisB<sup>D234N</sup>.

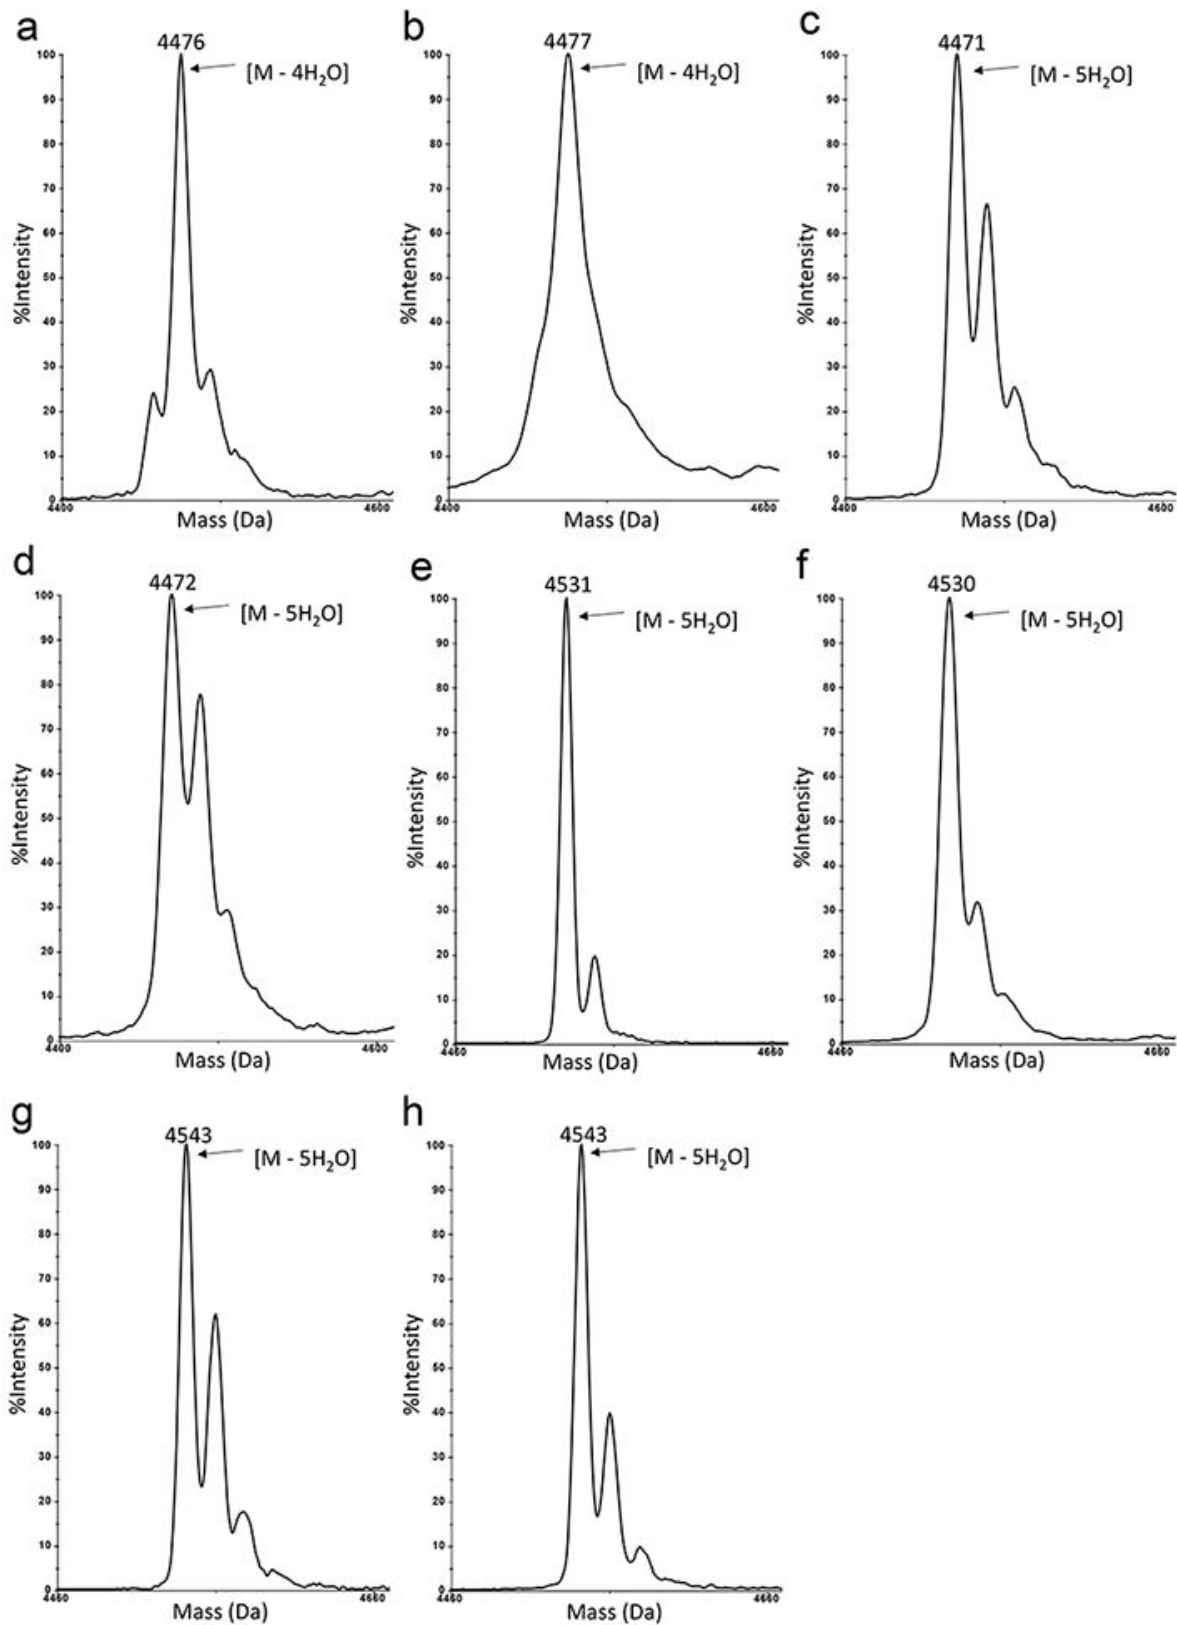

**Supplemental Figure 7.** MALDI-TOF MS data of peptides modified by NisB mutants. **a**, nisin(1-22)<sup>K12D</sup>, modified by NisB<sup>S88P</sup>; **b**, nisin(1-22)<sup>K12D</sup>, modified by NisB<sup>D234N</sup>; **c**, nisin(1-22)<sup>K12E</sup>, modified by NisB<sup>S88P</sup>; **d**, nisin(1-22)<sup>K12E</sup>, modified by NisB<sup>D234N</sup>; **e**, nisin(1-22)<sup>G14D</sup>, modified by NisB<sup>S88P</sup>; **f**, nisin(1-22)<sup>G14D</sup>, modified by NisB<sup>D234N</sup>; **g**, nisin(1-22)<sup>G14E</sup>, modified by NisB<sup>S88P</sup>; **h**, nisin(1-22)<sup>G14E</sup>, modified by NisB<sup>D234N</sup>.



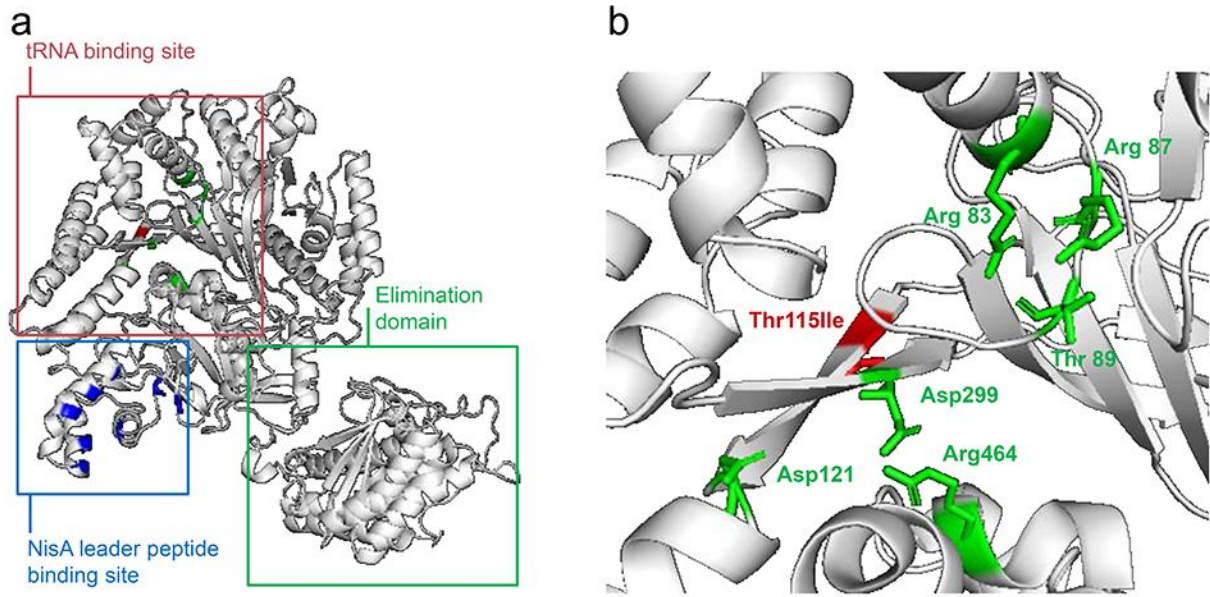

**Supplemental Figure 8.** a, Overall structure of the NisB dehydratase and the functions of each domain <sup>1</sup>. b, glutamyl-tRNA<sup>Glu</sup> binding site. Amino acids are shown in green that are known to be important for tRNA binding; mutation points of NisB<sup>T115I</sup> are show in red.

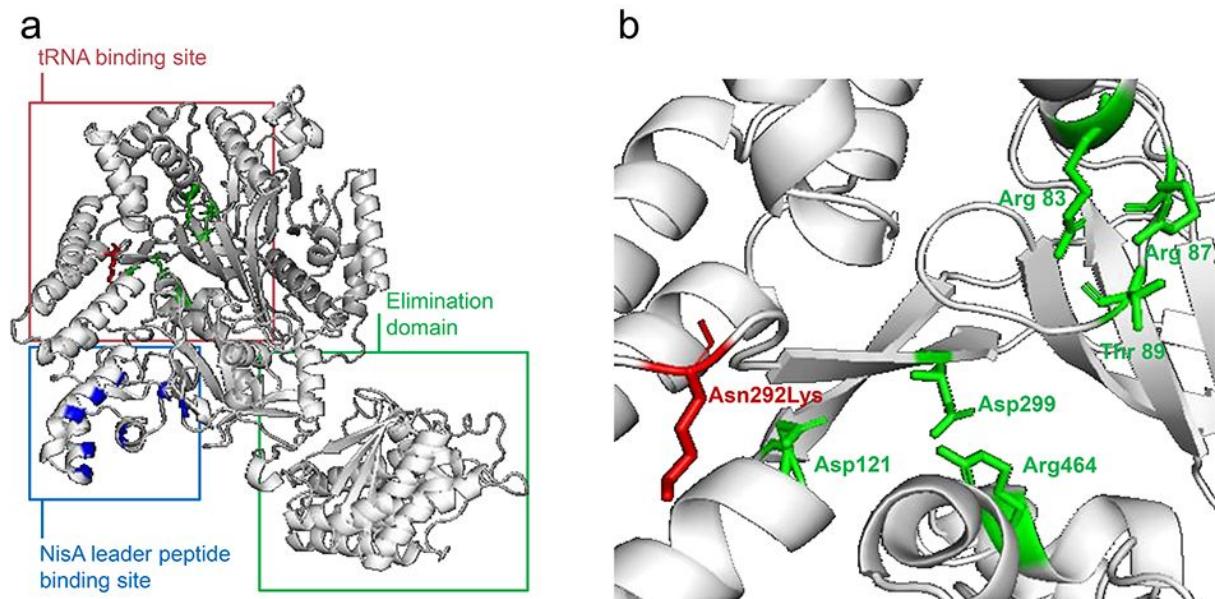

**Supplemental Figure 9.** **a**, Overall structure of the NisB dehydratase and the functions of each domain <sup>1</sup>. **b**, glutamyl-tRNA<sup>Glu</sup> binding site. Amino acids are shown in green that are known to be important for tRNA binding; mutation points of NisB<sup>N292K</sup> are shown in red.

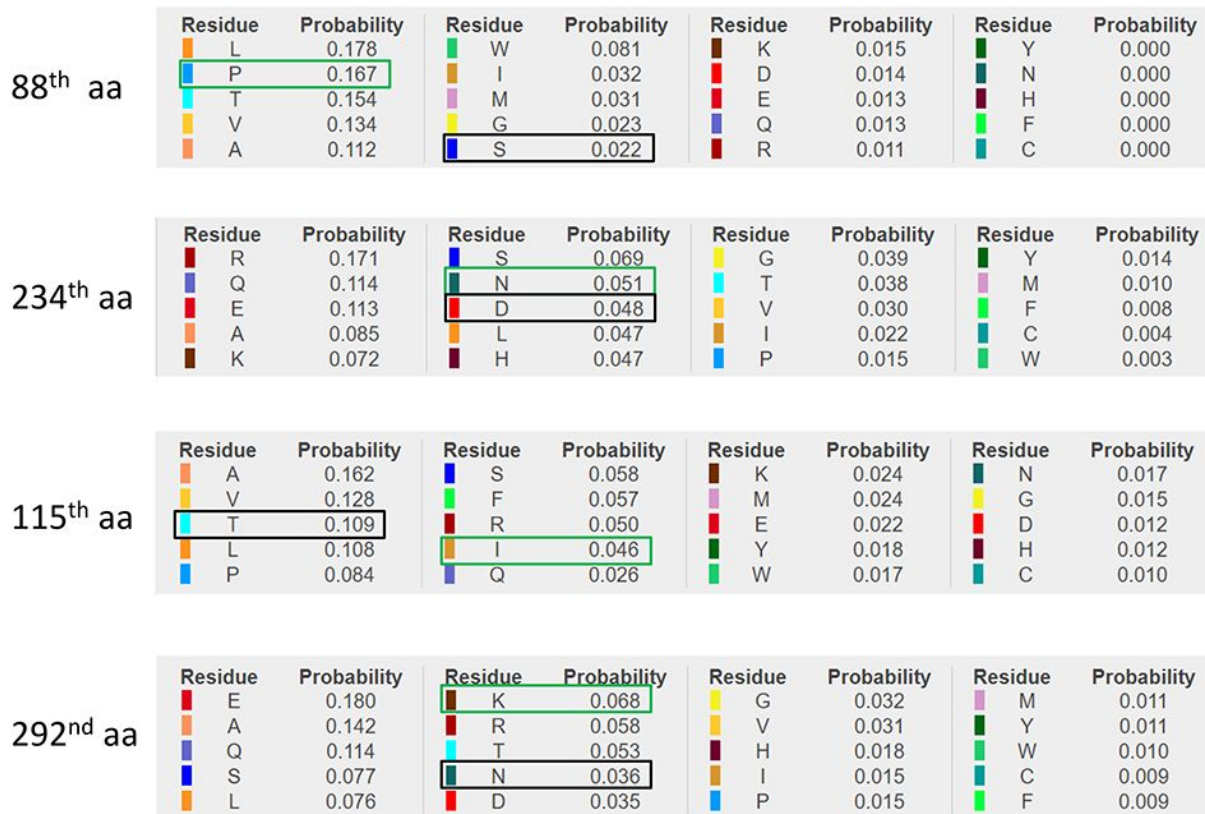

**Supplemental Figure 10.** LanB-alignment-based probability of amino acid occurrence in positions 88, 234, 115 and 292. Following the obtention of S88P, D234N, T115I, N292K mutations in NisB, the LanB family were aligned based on the full model of the N terminal domains (PFAM PF04737 [http://pfam.xfam.org/family/Lant\\_dehyd\\_N](http://pfam.xfam.org/family/Lant_dehyd_N)). The figure depicts the probability of the occurrence of each amino acid in the four positions. Clearly none of the four positions is conserved. Wild type amino acid is marked by black rectangle; amino acid of mutation is marked by a green rectangle. In positions 88, 234 and 292 the probability of the new amino acid is higher than of the wild type amino acid.

**Supplemental Table 1.** Stains and plasmids used in this study.

| Strain or plasmid            | Characteristics                                                                                              | Source or reference  |
|------------------------------|--------------------------------------------------------------------------------------------------------------|----------------------|
| <i>Strains</i>               |                                                                                                              |                      |
| <i>L. lactis</i> NZ9000      | MG1363 derivative; NisRK+                                                                                    | 2                    |
| <i>E. coli</i> XL-10 gold    | XL10-Gold Ultracompetent Cells                                                                               | Agilent Technologies |
| <i>Plasmids</i>              |                                                                                                              |                      |
| pNZnisA leader his2          | pNZ8048 derivative, nisA, Cm <sup>r</sup> , encoding his6 residues behind the first Met gene of nisin leader | 3                    |
| pCS1                         | pNZ8048 derivative, CS1, Cm <sup>r</sup>                                                                     | This work            |
| pCS2                         | pNZ8048 derivative, CS2, Cm <sup>r</sup>                                                                     | This work            |
| pCS3                         | pNZ8048 derivative, CS3, Cm <sup>r</sup>                                                                     | This work            |
| pCS4                         | pNZ8048 derivative, CS4, Cm <sup>r</sup>                                                                     | This work            |
| pCS5                         | pNZ8048 derivative, CS5, Cm <sup>r</sup>                                                                     | This work            |
| pCS5A                        | pNZ8048 derivative, CS5A, Cm <sup>r</sup>                                                                    | This work            |
| pCS5D                        | pNZ8048 derivative, CS5D, Cm <sup>r</sup>                                                                    | This work            |
| pCS5E                        | pNZ8048 derivative, CS5E, Cm <sup>r</sup>                                                                    | This work            |
| pCS5H                        | pNZ8048 derivative, CS5H, Cm <sup>r</sup>                                                                    | This work            |
| pCS5M                        | pNZ8048 derivative, CS5M, Cm <sup>r</sup>                                                                    | This work            |
| pCS5R                        | pNZ8048 derivative, CS5R, Cm <sup>r</sup>                                                                    | This work            |
| pCS5W                        | pNZ8048 derivative, CS5W, Cm <sup>r</sup>                                                                    | This work            |
| pBD-CS5                      | pNZ8048 derivative, BD-CS5, Cm <sup>r</sup>                                                                  | This work            |
| pBDA                         | pNZ8048 derivative, BDA, Cm <sup>r</sup>                                                                     | This work            |
| pBD-CS5D                     | pNZ8048 derivative, BD-CS5D, Cm <sup>r</sup>                                                                 | This work            |
| pBDD                         | pNZ8048 derivative, BDD, Cm <sup>r</sup>                                                                     | This work            |
| pNZnisA                      | pNZ8048 derivative, Nisin, Cm <sup>r</sup>                                                                   | 4                    |
| pNisin <sup>T2D</sup>        | pNZ8048 derivative, Nisin <sup>T2D</sup> , Cm <sup>r</sup>                                                   | 5                    |
| pNisin <sup>T2E</sup>        | pNZ8048 derivative, Nisin <sup>T2E</sup> , Cm <sup>r</sup>                                                   | 5                    |
| pNisin(1-22)                 | pNZ8048 derivative, Nisin(1-22), Cm <sup>r</sup>                                                             | 5                    |
| pNisin(1-22) <sup>K12D</sup> | pNZ8048 derivative, Nisin(1-22) <sup>K12D</sup> , Cm <sup>r</sup>                                            | This work            |
| pNisin(1-22) <sup>K12E</sup> | pNZ8048 derivative, Nisin(1-22) <sup>K12E</sup> , Cm <sup>r</sup>                                            | This work            |
| pNisin(1-22) <sup>G14D</sup> | pNZ8048 derivative, Nisin(1-22) <sup>G14D</sup> , Cm <sup>r</sup>                                            | This work            |
| pNisin(1-22) <sup>G14E</sup> | pNZ8048 derivative, Nisin(1-22) <sup>G14E</sup> , Cm <sup>r</sup>                                            | This work            |
| pTLR-BTC                     | P <sub>nis</sub> nisBTC, Em <sup>r</sup>                                                                     | 6                    |

**Supplemental Table 2.** Primers for PCRs used in this study.

| Plasmids                     | Templates        | Primers | Nucleic acid sequences (5' to 3')                             | Characteristics (5'-lable) |
|------------------------------|------------------|---------|---------------------------------------------------------------|----------------------------|
| pCS1                         | pNZnisA          | PXZ1    | AAGCTTTCTTTGAACCAAAAATTAGAAAACCAAG                            | 5'- phosphorylation        |
|                              |                  | PXZ2    | ATTTGTTACAAAATTGTGGGTGTGATTTGCTTAC<br>GTGAATACTACAATGACAAGTTG |                            |
| pCS2                         | pNZnisA          | PXZ1    | AAGCTTTCTTTGAACCAAAAATTAGAAAACCAAG                            | 5'- phosphorylation        |
|                              |                  | PXZ3    | ATTTACAAAATTGTGGGTGTGATTTGCTTACGTG<br>AATACTACAATGACAAGTTG    |                            |
| pCS3                         | pNZnisA          | PXZ1    | AAGCTTTCTTTGAACCAAAAATTAGAAAACCAAG                            | 5'- phosphorylation        |
|                              |                  | PXZ4    | ATTTGTTACAAAATTGTGGGTGTGATTTTCATGTT<br>ACAACCCATCAGAGCTC      |                            |
| pCS4                         | pNZnisA          | PXZ1    | AAGCTTTCTTTGAACCAAAAATTAGAAAACCAAG                            | 5'- phosphorylation        |
|                              |                  | PXZ5    | ATTTACAAAATTGTGGGTGTGATTTTCATGTTACA<br>ACCCATCAGAGCTC         |                            |
| pCS5                         | pNZnisA          | PXZ1    | AAGCTTTCTTTGAACCAAAAATTAGAAAACCAAG                            | 5'- phosphorylation        |
|                              |                  | PXZ6    | ATTTGTTACAAAATTGTGGGTGTGATTTACAACC<br>GGGTGTACATAGCGAAATAC    |                            |
| pCS5A/<br>pBDA               | pCS5/<br>pBDD    | PXZ7    | TTTACAACCGGGTGTACATAGCGAAATAC                                 | 5'- phosphorylation        |
|                              |                  | PXZ8    | GCTTCACACCCACAATTTTGTAACAAATAAGCTTTC                          |                            |
| pCS5D/<br>pBD-CS5D           | pCS5/<br>pBD-CS5 | PXZ7    | TTTACAACCGGGTGTACATAGCGAAATAC                                 | 5'- phosphorylation        |
|                              |                  | PXZ9    | GATTCACACCCACAATTTTGTAACAAATAAGCTTTC                          |                            |
| pCS5E                        | pCS5             | PXZ7    | TTTACAACCGGGTGTACATAGCGAAATAC                                 | 5'- phosphorylation        |
|                              |                  | PXZ10   | GAATCACACCCACAATTTTGTAACAAATAAGCTTTC                          |                            |
| pCS5H                        | pCS5             | PXZ7    | TTTACAACCGGGTGTACATAGCGAAATAC                                 | 5'- phosphorylation        |
|                              |                  | PXZ11   | CACTCACACCCACAATTTTGTAACAAATAAGCTTTC                          |                            |
| pCS5M                        | pCS5             | PXZ7    | TTTACAACCGGGTGTACATAGCGAAATAC                                 | 5'- phosphorylation        |
|                              |                  | PXZ12   | ATGTCACACCCACAATTTTGTAACAAATAAGCTTTC                          |                            |
| pCS5R                        | pCS5             | PXZ7    | TTTACAACCGGGTGTACATAGCGAAATAC                                 | 5'- phosphorylation        |
|                              |                  | PXZ13   | AGATCACACCCACAATTTTGTAACAAATAAGCTTTC                          |                            |
| pCS5W                        | pCS5             | PXZ7    | TTTACAACCGGGTGTACATAGCGAAATAC                                 | 5'- phosphorylation        |
|                              |                  | PXZ14   | TGGTCACACCCACAATTTTGTAACAAATAAGCTTTC                          |                            |
| pBDD                         | pBD-CS5D         | PXZ15   | GTGATGATGCATGGTGTGAGTGCCTCCTTATAATTTATTTTG                    | 5'- phosphorylation        |
|                              |                  | PXZ16   | CATCACCATAGTACAAAAGATTTTAACTTGGATTGGTAT<br>CTG                |                            |
| pNisin(1-22) <sup>K12D</sup> | pNisin(1-22)     | PXZ17   | ACAACCGGGTGTACATAGCGAAATAC                                    | 5'- phosphorylation        |
|                              |                  | PXZ18   | GATACAGGAGCTCTGATGGGTTGTAAC                                   |                            |
| pNisin(1-22) <sup>K12E</sup> | pNisin(1-22)     | PXZ17   | ACAACCGGGTGTACATAGCGAAATAC                                    | 5'- phosphorylation        |
|                              |                  | PXZ19   | GAAACAGGAGCTCTGATGGGTTGTAAC                                   |                            |
| pNisin(1-22) <sup>G14D</sup> | pNisin(1-22)     | PXZ20   | ATTTGTTACAAAATTGTGGGTGTGATTTACAACCGG<br>GTGTACATAGCGAAATAC    | 5'- phosphorylation        |
|                              |                  | PXZ21   | ACAGATGCTCTGATGGGTTGTAACATGAAATAAG                            |                            |
| pNisin(1-22) <sup>G14E</sup> | pNisin(1-22)     | PXZ20   | ATTTGTTACAAAATTGTGGGTGTGATTTACAACCGG<br>GTGTACATAGCGAAATAC    | 5'- phosphorylation        |
|                              |                  | PXZ22   | ACAGAAGCTCTGATGGGTTGTAACATGAAATAAG                            |                            |

**Supplemental Table 3.** Primers for PCRs used in this study.

| Primers | Nucleic acid sequences (5' to 3')                          | Purpose                                                                             |
|---------|------------------------------------------------------------|-------------------------------------------------------------------------------------|
| Pbd1    | GAAGTTCTGTTTCAAGGACCCTTGCAGGCAGCTAAGCAGGAAC                | To construct the plasmid that encoding the gene of bacterial display protein BD-CS5 |
| Pbd2    | CTAATTTTGGTTCAAAGAAAGCTTATTCTTCACGTTGTTCCGTTTCAATC         |                                                                                     |
| Pbd3    | CAGCTCCAAGATCTAGTCTTATAACTATACTGAC                         |                                                                                     |
| Pbd4    | CAAGGGTCCTTGAAAACAGAAGCTTCCAATTTGTTACAAAATTGTGGGTGTGATTTAC |                                                                                     |
| Pbd5    | GAAGAATAAGCTTTCTTTGAACCAAAATTAGAAAACCAAG                   |                                                                                     |
| Pbd6    | CTTAGCAATAGCGTCCTTTGATTCATG                                |                                                                                     |
| Ptlr1   | AACTTTTTATCAUGTTTTTCTCTCTTTATTTTATAAGC                     | NisB library construction                                                           |
| Ptlr2   | ATACATGAAAUGAGGACTAATAGATGGATGAAGTGAAAAG                   |                                                                                     |
| Ptlr3   | ATGATAAAAAGTUCATTTAAAGCTCAACCGTTTTTAG                      |                                                                                     |
| Ptlr4   | ATTTTATGTAUTCTTCCGAAAACAAACAACCTTTGAAGTGTG                 |                                                                                     |
| PS1     | CTATCAATCAAAGCAACACGTGC                                    | Sequencing                                                                          |
| PS2     | GATAACGCGAGCATAATAAACGG                                    |                                                                                     |
| PS3     | CTCCAAACGATAAACGGAGTTTTAC                                  |                                                                                     |
| PS4     | AACCCTTTCTTCTTAAACAGACCAGC                                 |                                                                                     |
| PS5     | GATTTGTTGTCAGATTTTTCTTGGAAC                                |                                                                                     |
| PS6     | GAATTTGGCAAAGGAGTATGAAAAG                                  |                                                                                     |
| PS7     | CCCAAAGAGTTTTATATTGTCAATGG                                 |                                                                                     |
| PS8     | CGAAGCAATATTTGTGCCGATTC                                    |                                                                                     |

## References

- (1) Ortega, M. A.; Hao, Y.; Zhang, Q.; Walker, M. C.; van der Donk, W. A.; Nair, S. K. Structure and Mechanism of the TRNA-Dependent Lantibiotic Dehydratase NisB. *Nature* 2015, 517 (7535), 509.
- (2) Kuipers, O. P.; de Ruyter, P. G. G. A.; Kleerebezem, M.; de Vos, W. M. Controlled Overproduction of Proteins by Lactic Acid Bacteria. *Trends Biotechnol.* **1997**, 15 (4), 135–140.
- (3) Li, Q.; Montalban-Lopez, M.; Kuipers, O. P. Increasing the Antimicrobial Activity of Nisin-Based Lantibiotics against Gram-Negative Pathogens. *Appl. Environ. Microbiol.* **2018**, 84 (12), e00052-18.
- (4) Zhou, L.; van Heel, A. J.; Montalban-Lopez, M.; Kuipers, O. P. Potentiating the Activity of Nisin against Escherichia Coli. *Front. cell Dev. Biol.* **2016**, 4, 7.
- (5) Zhao, X.; Yin, Z.; Breukink, E.; Moll G.N.; Kuipers, O. P. An engineered double lipid II binding motifs-containing lantibiotic displays potent and selective antimicrobial activity against *E. faecium*. *Antimicrob. Agents Chemother.* (**2020**).
- (6) Cebrian, R.; Macia-Valero, A.; Jati, A. P.; Kuipers, O. P. Design and Expression of Specific Hybrid Lantibiotics Active against Pathogenic Clostridium Spp. *Front. Microbiol.* **2019**, 10.
